# Supplementary material for: The association and aggregation of the metamorphic chemokine lymphotactin with fondaparinux: from nm molecular complexes to μm molecular assemblies
Source: Royal Society of Chemistry journal article supplement (doi:10.1039/c5cc05801e), 2015-10-26
Supplement: c5cc05801e1.pdf [file c5cc05801e1.pdf]

## Insights into the association and aggregation of the Metamorphic Chemokine Lymphotactin with Fondaparinux.

Sophie R. Harvey<sup>a</sup>, Cait E. MacPhee<sup>b</sup>, Brian F. Volkman<sup>c</sup> and Perdita E. Barran<sup>d\*</sup>

a. School of Chemistry, University of Edinburgh, West Mains Road, EH8 3JJ, Edinburgh, UK

b. School of Physics and Astronomy, University of Edinburgh, West Mains Road, EH9 3JZ, Edinburgh, UK

c. Department of Biochemistry, medical College of Wisconsin, Milwaukee, WI 53226, USA

d. School of Chemistry, Manchester Institute of Biotechnology, University of Manchester, M1 7DN, UK.\*

Email:Perdita.barran@Manchester.ac.uk

Supporting information

### Experimental details

#### *TEM studies*

For transmission electron microscopy (TEM) studies samples were prepared at 50  $\mu\text{M}$  protein concentration at a 1:1 ratio of Ltn:Fx. In all cases samples were prepared in 20 mM AmAc at pH 6.8 and left to incubate for 30 minutes before grid preparation. In addition individual solutions of WT Ltn and Fx, at 50  $\mu\text{M}$  in 20 mM AmAc were studied as controls. All transmission electron microscopy (TEM) experiments were performed on a Philips CM120 Biotin transmission electron microscope (Philips, Eindhoven, Netherlands) with an operating voltage of -80 kV. The preparation of TEM grids for analysis was as follows; 3  $\mu\text{L}$  of sample was spotted onto a 3.05 mm, 200 mesh copper grid (Taab, Aldermaston, UK) coated with formvar and carbon and left for five minutes. The grid was then dried and rinsed once with 10  $\mu\text{L}$  high purity water, after which the excess water was wicked off. The sample was then stained using 4  $\mu\text{L}$  1 % uranyl acetate (w/v) and left for 30 seconds before the excess stain was wicked off. The grid was then left to dry overnight.

#### *MS studies*

In all cases samples were prepared in 20 mM AmAc, at pH 6.8 and analysed immediately after sample preparation. For all Ltn samples individual protein plus Fx solutions were prepared at 50  $\mu\text{M}$  protein concentration at a 1:1 ratio of Ltn:Fx. WT Ltn was additionally studied at a 1:1 ratio at 25 and 10  $\mu\text{M}$ , and at a 2:1 ratio (Ltn:Fx) at a 25  $\mu\text{M}$  Ltn concentration. WT 1-72 was also studied at 1:1 and 2:1 ratios (Ltn:Fx) at a 25  $\mu\text{M}$  protein concentration. The interactions of WT 72-93 plus WT 1-72 with Fx were also considered using MS. n-ESI was utilized for all MS and DT IM-MS experiments. Sample solutions were ionized through a potential applied to a thin platinum wire inserted in a glass capillary. Nanoelectrospray tips were made in-house using thin-walled glass capillaries (i.d.0.5 mm) using a Flaming/Brown micropipette puller (Sutter Instrument Company, Novato, CA, U.S.A.).

#### *DT IM- MS studies*

For determination of CCS for Ltn:Fx species WT, CC3 (monomer mutant) and W55D (dimer mutant) constructs were prepared at 100  $\mu\text{M}$  protein concentration in 20 mM AmAc at a 1:1 (Ltn:Fx) ratio. WT 1-72 was studied at 50  $\mu\text{M}$  in 20 mM AmAc at a 2:1 ratio with fondaparinux. All DT IM-MS measurements were performed on an in-house-modified Q-TOF (Micromass U.K. Ltd.), adapted in order to carry out separations based on an ion's mobility and to enable the temperature dependent CCS to be determined from the measured m/z selected arrival time distributions (ATDs). This is possible via the inclusion of a

5.1 cm long copper drift cell and supplementary ion optics situated post source but before the quadrupole analyzer. The instrument and its operation have been described in detail elsewhere<sup>1</sup>

## TEM

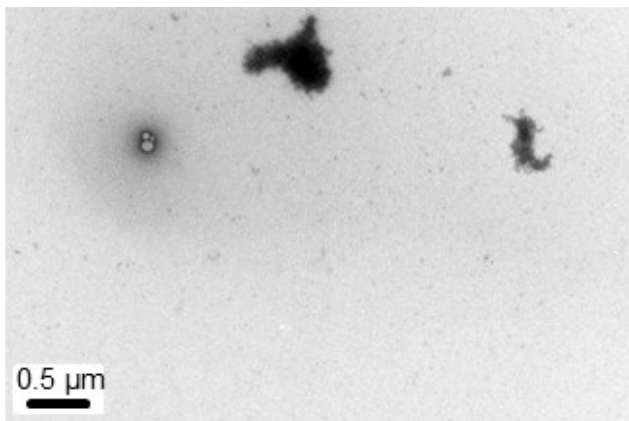

Fig S1: Representative TEM image for Fx at 50 μM concentration in 20 mM ammonium acetate.

MS

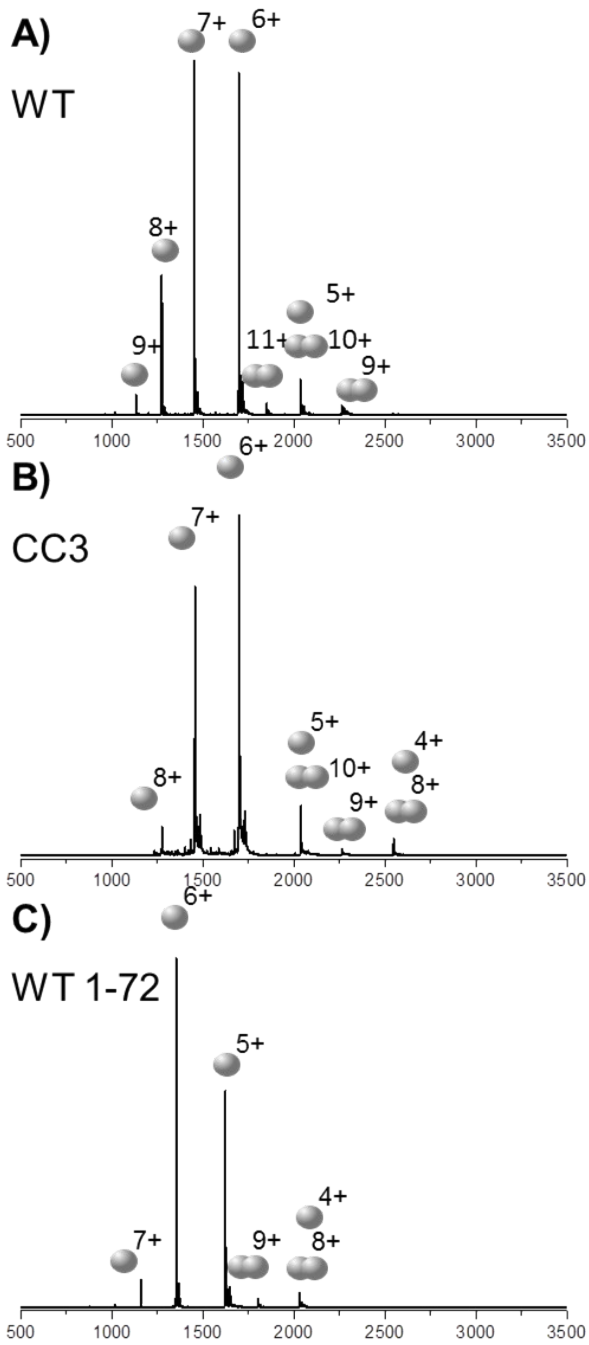

Fig S2: Spectra acquired for Ltn, at 50  $\mu$ M protein concentration in 20 mM ammonium acetate A) WT ltn B) CC3 C) structural core, WT 1-72 and D) ID tail, WT 72-93

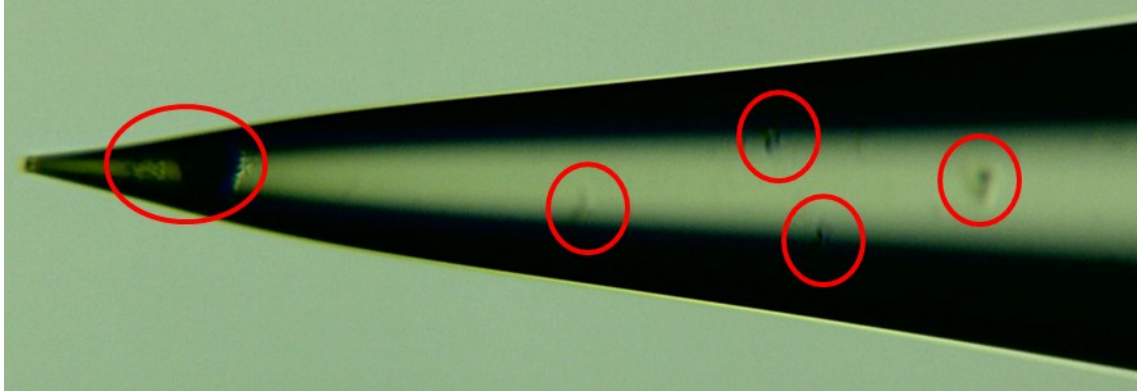

Fig S3: Large visible aggregates circled in red are observed upon addition of Fx to Ltn solutions, representative image shown here for WT 1-72 Ltn plus Fx prepared at a 1:1 ratio of Ltn:Fx, at 50  $\mu$ M protein concentration in 20 mM ammonium acetate

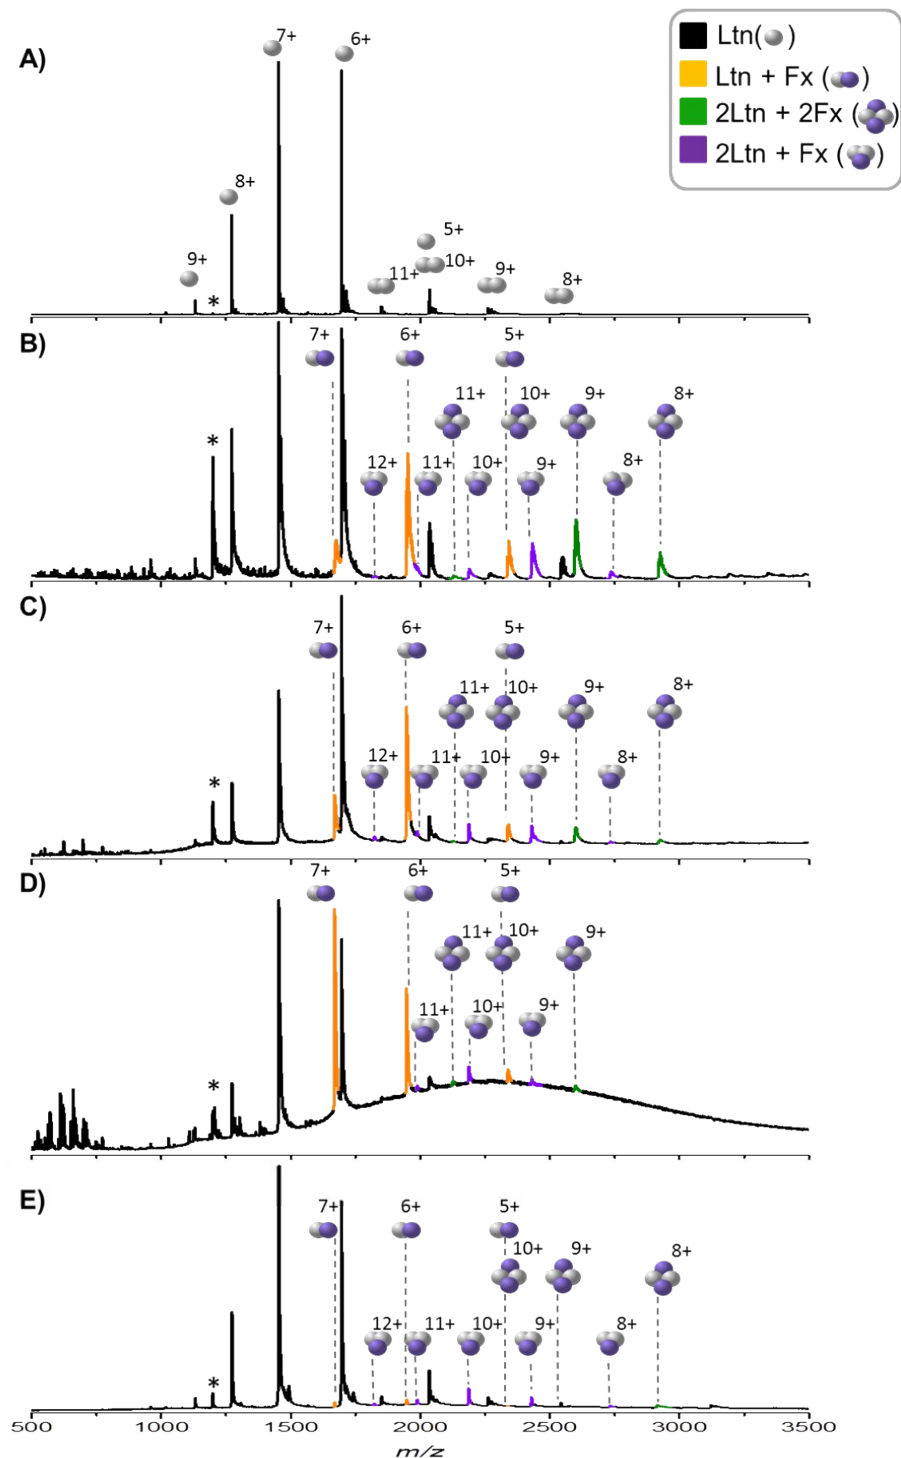

Fig. S4: Spectra obtained for WT Ltn A) 50  $\mu$ M B) 50  $\mu$ M plus 50  $\mu$ M Fx (1:1, Ltn:Fx6587) C) 25  $\mu$ M plus 25  $\mu$ M Fx (1:1) D) 10  $\mu$ M plus 10  $\mu$ M Fx (1:1) and E) 25  $\mu$ M plus 12.5  $\mu$ M Fx (2:1) \* denotes a species observed in all spectra presumably a contaminant left over after purification. In panel A all Ltn species are labelled. For figure clarity in panels B-E only GAG bound species are labelled.

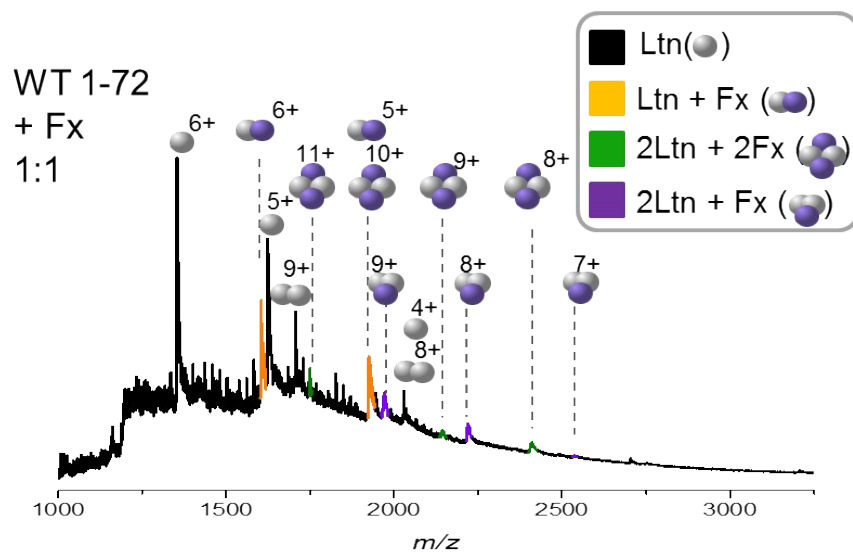

Fig. S5: nESI mass spectrum acquired from a 1:1 mixture of WT 1-72 plus Fx, at 50  $\mu$ M protein concentration in 20 mM ammonium acetate.

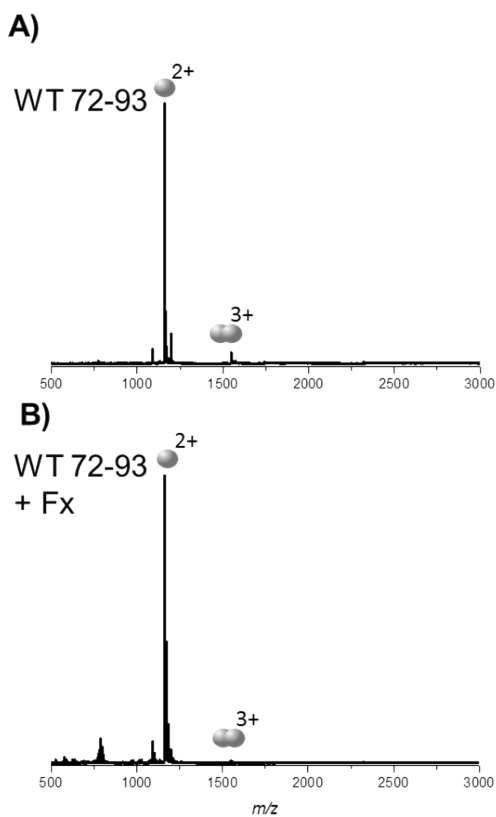

Fig. S6: nESI mass spectrum acquired for A) WT 72-93 and B) WT 72-93 plus Fx, at 50  $\mu$ M protein concentration in 20 mM ammonium acetate. For Fx studies a stoichiometric concentration of Fx was used.

| <i>Species</i>             | <i>WT</i>       | <i>CCS/ Å<sup>2</sup></i> |                             |
|----------------------------|-----------------|---------------------------|-----------------------------|
|                            |                 | <i>CC3</i>                | <i>WT 1-72</i>              |
| [M+4H] <sup>4+</sup>       | 757±4           | -                         | 856±4                       |
| [M+5H] <sup>5+</sup>       | 967±13          | 1012±2                    | 916±8                       |
| [M+6H] <sup>6+</sup>       | 1021±21         | 1014±4                    | 950±9                       |
| [M+7H] <sup>7+</sup>       | 1100±63         | 1163±4                    | 1037,1229±12                |
| [M+8H] <sup>8+</sup>       | 1528±8          | 1243±5                    | 1416±8                      |
| [M+9H] <sup>9+</sup>       | 1560±40,1685    | -                         | -                           |
| [D+8H] <sup>8+</sup>       | 1376±25         | -                         | 1404±6                      |
| [D+9H] <sup>9+</sup>       | 1605±12,1534    | 1611±2                    | 1425±8                      |
| [D+10H] <sup>10+</sup>     | 1778±47         | 1802±5                    | 1603                        |
| [D+11H] <sup>11+</sup>     | 1822            | -                         | 1751±10,1872±4              |
| [D+12H] <sup>12+</sup>     | 1894            | -                         | 1861±8                      |
| [D+13H] <sup>13+</sup>     | 1902            | -                         | -                           |
| [M+Fx+4H] <sup>4+</sup>    | -               | -                         | 946                         |
| [M+Fx+5H] <sup>5+</sup>    | 845±27          | 833±7                     | 995±16                      |
| [M+Fx+6H] <sup>6+</sup>    | 1004±8          | 1075±21                   | 1232±46                     |
| [M+Fx+7H] <sup>7+</sup>    | 1247±54         | 1105±13                   | -                           |
| [D+Fx+7H] <sup>7+</sup>    | -               | -                         | 1403±25,1660±12             |
| [D+Fx+8H] <sup>8+</sup>    | -               | 1424±28                   | 1420±19,1788±5              |
| [D+Fx+9H] <sup>9+</sup>    | 1530±1          | 1524±16                   | 1624±20,1884±48,<br>2153±24 |
| [D+Fx+10H] <sup>10+</sup>  | 1602±7          | 1716±4                    | -                           |
| [D+2Fx+8H] <sup>8+</sup>   | 1426±31,1591±37 | 1423                      | -                           |
| [D+2Fx+9H] <sup>9+</sup>   | -               | 1624±13                   | -                           |
| [D+2Fx+10H] <sup>10+</sup> | 1651            | 1712±5                    | -                           |

Table S1. Experimental CCS for unbound (determined in absence of Fx<sup>2,3</sup>) and Fx bound WT, CC3 and WT 1-72 Ltn as shown in Fig. 3. Errors reported as standard deviation between three different day repeats.

| <i>Species</i>                        | <i>CCS/ Å<sup>2</sup></i> |                       |
|---------------------------------------|---------------------------|-----------------------|
|                                       | <i>Absence of Fx</i>      | <i>Presence of Fx</i> |
| [M <sub>WT</sub> +6H] <sup>6+</sup>   | 1021 ± 21                 | 1034 ± 47             |
| [M <sub>WT</sub> +7H] <sup>7+</sup>   | 1100 ± 63                 | 1077 ± 34             |
| [D <sub>WT</sub> +12H] <sup>12+</sup> | 1894*                     | 1893 ± 21             |

Table S2: Experimentally determined average CCS for all unbound WT species observed in the absence and presence of Fx, the error is reported as the standard deviation between repeats. \*species observed in all repeats but only resolvable in one.

| <i>Species</i>                       | <i>CCS/ Å<sup>2</sup></i> |                       |
|--------------------------------------|---------------------------|-----------------------|
|                                      | <i>Absence of Fx</i>      | <i>Presence of Fx</i> |
| [M <sub>CC3</sub> +6H] <sup>6+</sup> | 1014 ± 4                  | 1030 ± 28             |
| [M <sub>CC3</sub> +7H] <sup>7+</sup> | 1163 ± 4                  | 1181 ± 23             |

Table S3: Experimentally determined average CCS for all unbound CC3 species observed in the absence and presence of Fx, the error is reported as the standard deviation between repeats.

| <i>Species</i>                        | <i>CCS/ Å<sup>2</sup></i> |                       |
|---------------------------------------|---------------------------|-----------------------|
|                                       | <i>Absence of Fx</i>      | <i>Presence of Fx</i> |
| [M <sub>1-72</sub> +5H] <sup>5+</sup> | 916 ± 8                   | 909 ± 13              |
| [M <sub>1-72</sub> +6H] <sup>6+</sup> | 950 ± 9                   | 973 ± 20              |
| [M <sub>1-72</sub> +6H] <sup>6+</sup> | --                        | 1209 ± 13             |
| [M <sub>1-72</sub> +7H] <sup>7+</sup> | 1037*                     | 1142 ± 18             |
| [M <sub>1-72</sub> +7H] <sup>7+</sup> | 1229 ± 12                 | 1211 ± 3              |

Table S4: Experimentally determined average CCS for all unbound WT 1-72 species observed in the absence and presence of Fx, the error is reported as the standard deviation between repeats. \*species observed in all repeats but only resolvable in one.

### References

1. B. J. McCullough, J. Kalapothakis, H. Eastwood, P. Kemper, D. MacMillan, K. Taylor, J. Dorin and P. E. Barran, *Analytical chemistry*, 2008, **80**, 6336-6344.
2. S. R. Harvey, M. Porrini, A. Konijnenberg, D. J. Clarke, R. C. Tyler, P. R. Langridge-Smith, C. E. MacPhee, B. F. Volkman and P. E. Barran, *The Journal of Physical Chemistry B*, 2014.
3. S. R. Harvey, M. Porrini, R. Tyler, C. MacPhee, B. Volkman and P. Barran, *Physical Chemistry Chemical Physics*, 2015.
